# Supplementary material for: Hydroxyl Radical vs. One-Electron Oxidation Reactivities in an Alternating GC Double-Stranded Oligonucleotide: A New Type Electron Hole Stabilization
Source: MDPI journal article supplement (doi:10.3390/biom13101493), 2023-10-08
Supplement: s1 [file s1]

– SUPPLEMENTARY MATERIALS –

## **Hydroxyl Radical vs. One-Electron Oxidation Reactivities in an Alternating GC Double-Stranded Oligonucleotide: A New Type Electron Hole Stabilization**

**Annalisa Masi,<sup>†,§</sup> Amedeo Capobianco,<sup>§</sup> Krzysztof Bobrowski,<sup>#</sup> Andrea Peluso,<sup>§</sup> and  
Chrysostomos Chatgililoglu<sup>\*,†,¶</sup>**

<sup>†</sup> Istituto per la Sintesi Organica e la Fotoreattività, Consiglio Nazionale delle Ricerche, 40129 Bologna, Italy;

<sup>§</sup> Istituto di Cristallografia, Consiglio Nazionale delle Ricerche, Via Salaria km 29.300, 00015 Monterotondo, Roma, Italy;

<sup>§</sup> Dipartimento di Chimica e Biologia “A. Zambelli”, Università di Salerno, 84084 Fisciano, Italy;

<sup>#</sup> Centre of Radiation Research and Technology, Institute of Nuclear Chemistry and Technology, 03-195 Warsaw, Poland;

<sup>¶</sup> Center for Advanced Technologies, Adam Mickiewicz University, 61-614 Poznań, Poland

\* Corresponding Author: Email: [chrys@isof.cnr.it](mailto:chrys@isof.cnr.it).

### Synthesis and Purification of 5'-d(GCGCGC)-3'

The ODN single-strand 5'-d(GCGCGC)-3' was prepared by automated synthesis using the DMT- and the  $\beta$ -(cyanoethyl) phosphoramidite method, on CPG supports (500 Å), with an Expedite 8900 DNA synthesizer (Applied Biosystems, Monza MB, Italy) at 1  $\mu$ mol scale. The synthesized ODN was cleaved from the solid support and deprotected by the method of two syringes, using AMA reagent [ $\text{NH}_4\text{OH}$  (30%)/ $\text{CH}_3\text{NH}_2$  (40%) 1:1] for 10 min at room temperature followed by 15 min at 55 °C. The solvent was then removed in a Speedvac (Thermo Fisher Scientific, Monza MB, Italy). The crude 5'-DMT-on oligomer was purified and detritylated on-column by RP-HPLC (Grace Vydac C18 column 5  $\mu$ m, 50 x 22 mm, Thermo Fisher Scientific, Rodano (MI), Italy). The ODN was further purified by SAX HPLC (preparative DNA Pac PA-100 column, 13  $\mu$ m, 22 x 250 mm, Thermo Fisher Scientific, Rodano (MI), Italy) with TRIS HCl 25 mM, pH = 8.0 (buffer A) and TRIS HCl 25 mM,  $\text{NaClO}_4$  0.5 M, pH = 8.0 (buffer B) at a flow rate of 9 mL/min eluting with 2-30 % B in 30 min, 30% B for 10 min, then 30-40% B in 5 min monitoring at 254 nm. The purified ODN fractions were concentrated, desalted on Waters SepPak<sup>TM</sup>-C18-cartridges (Sesto San Giovanni (MI), and lyophilized. The final yield was estimated by UV absorption in aqueous solution at 260 nm by a Cary 100 UV/Vis Spectrometer (Agilent, Cernusco sul Naviglio (MI), Italy). The purity of the ODN was determined by analytical SAX HPLC chromatography (DNA Pac PA100, 13  $\mu$ m, 4 x 250 mm, Thermo Fisher Scientific, Rodano (MI), Italy) (Figure S1).

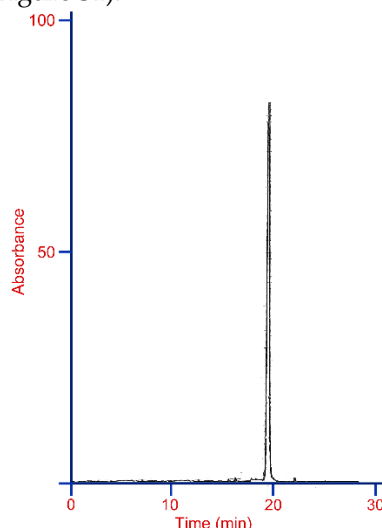

**Figure S1.** Analytical SAX HPLC chromatograms of purified ODNs. Column and conditions: SAX DNAPac PA-100 column, 5 $\mu$ m, 4x250 mm; mobile phase A: TRIS.HCl 25 mM, pH 8.0, mobile phase B: TRIS.HCl 25mM,  $\text{NaClO}_4$  0.5M, pH 8.0. Gradient: 2-30 % B in A in 30 min. Flow rate was 1 mL/min.

### Preparation of ds-ODN and Melting Point Experiments

To obtain the ds-ODN, the single strand 5'-d(GCGCGC)-3' was annealed in buffer solution containing 50 mM sodium phosphate ( $\text{NaH}_2\text{PO}_4$ ). A set of UV melting measurements were carried out to investigate the relative stability of ds-ODN under buffer solutions containing different sodium ion concentrations and minimizing the presence of chloride ions ( $\text{Cl}^-$ ). It is well-known that  $\text{Cl}^-$  reacts quite fast with  $\text{HO}^\bullet$  in aqueous solution producing  $\text{Cl}^\bullet$  and  $\text{HO}^-$ . To overcome this problem and in order to find the best condition to ensure the stability of ds-ODN, reducing the concentration of chloride ions, different buffers were tested (see Table S1). The substrates were constructed by heating the two strands of the substrates at 90 °C for 10 min and

subsequently allowing the temperature to drop slowly to room temperature (25 °C). The melting curves were determined by monitoring the absorbance of the solutions at 260 nm as a function of temperature. A Cary 100 spectrophotometer system equipped with a 1 mL quartz cuvette with a 1 cm path length was used for the measurements. The temperature cycles from 20 to 80 °C per experiment were recorded with a temperature controller using a 0.3 °C/min heating rate. The recorded  $T_m$  values are reported in Table S1, which represent the temperature at which 50% of the ds-ODN is unpaired. The higher its value the more stable the duplex.

**Table S1.** Melting points ( $T_m$ ) of the hexamer ds-ODN in different buffer conditions

| Entry | 5'-d(GCGCGC)-3' duplex                                    | $T_m$ (°C) |
|-------|-----------------------------------------------------------|------------|
| 1     | NaH <sub>2</sub> PO <sub>4</sub> (100 mM)                 | 45.9       |
| 2     | NaH <sub>2</sub> PO <sub>4</sub> (50 mM)                  | 45.9       |
| 3     | NaH <sub>2</sub> PO <sub>4</sub> (10 mM)                  | 36.3       |
| 4     | NaH <sub>2</sub> PO <sub>4</sub> (100 mM) + NaCl (100 mM) | 46.5       |
| 5     | NaH <sub>2</sub> PO <sub>4</sub> (100 mM) + NaCl (20 mM)  | 41.5       |

In Figure S2 the comparison of different melting curves of ds-ODN is reported. The comparison for 100 mM vs. 50 mM of NaH<sub>2</sub>PO<sub>4</sub> buffers (entries 1 vs 2) indicates the same  $T_m$  and very similar melting curves (Figure S2A). Analyzing the area around 20 °C, a different absorbance is observed, where the ds-ODN percentage of 82% was calculated for entry 1 versus 87% for entry 2, highlighting a greater stability for the latter condition. In Figure S2B, the 50 mM NaH<sub>2</sub>PO<sub>4</sub> buffer is compared to 100 mM NaH<sub>2</sub>PO<sub>4</sub> + 100 mM NaCl, where the  $T_m$  of the latter is slightly higher ( $\Delta T = 0.6$  °C). Analyzing the areas around 20 °C, similar percentages of duplex are calculated (87% for entry 2 vs 91% for entry 4), while between 20-30 °C the absorbance of the blue curve increases, due to the hyperchromic effect, whereas the absorbance of the pink curve does not change, indicating a greater stability.

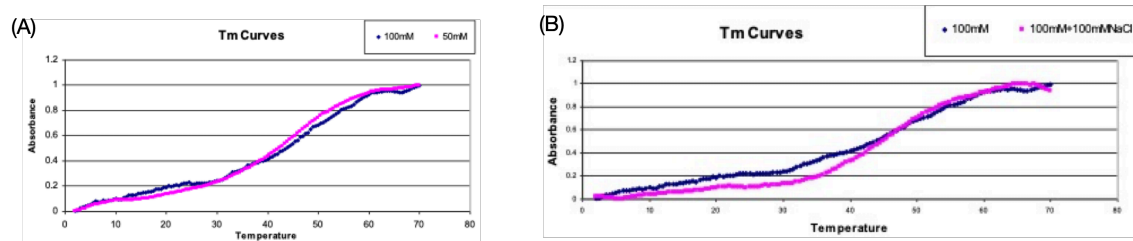

**Figure S2.** Melting curves of ds-ODN: (A) 100 mM NaH<sub>2</sub>PO<sub>4</sub> (blue) vs. 50 mM NaH<sub>2</sub>PO<sub>4</sub> (pink); (B) 100 mM NaH<sub>2</sub>PO<sub>4</sub> (blue) vs. 100 mM NaH<sub>2</sub>PO<sub>4</sub> + NaCl (100 mM) (pink).

## Theoretical Calculations

**Table S2.** Predicted energy changes ( $\Delta E$ , kcal/mol) for addition of  $\text{SO}_4^{\bullet-}$  to  $\text{meG:C}^{\text{me}}$  pair in water; spectroscopic properties, wavelengths and oscillator strength, of the radical adducts in water.

|                                                                                                         |       |                                                                                                        |       |                                                                                                         |       |
|---------------------------------------------------------------------------------------------------------|-------|--------------------------------------------------------------------------------------------------------|-------|---------------------------------------------------------------------------------------------------------|-------|
| 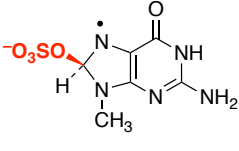<br>$\Delta E = -12.8$ |       | <br>$\Delta E = -5.6$ |       | <br>$\Delta E = -4.6$ |       |
| $\lambda$ , nm                                                                                          | $f$   | $\lambda$ , nm                                                                                         | $f$   | $\lambda$ , nm                                                                                          | $f$   |
| 434                                                                                                     | 0.015 | 430                                                                                                    | 0.052 | 799                                                                                                     | 0.003 |
| 397                                                                                                     | 0.021 | 347                                                                                                    | 0.018 | 619                                                                                                     | 0.015 |
| 390                                                                                                     | 0.002 | 308                                                                                                    | 0.020 | 480                                                                                                     | 0.020 |
| 377                                                                                                     | 0.041 | 293                                                                                                    | 0.013 | 400                                                                                                     | 0.012 |
| 355                                                                                                     | 0.002 |                                                                                                        |       |                                                                                                         |       |
| 336                                                                                                     | 0.010 |                                                                                                        |       |                                                                                                         |       |
| 329                                                                                                     | 0.001 |                                                                                                        |       |                                                                                                         |       |
| 324                                                                                                     | 0.003 |                                                                                                        |       |                                                                                                         |       |
| 320                                                                                                     | 0.017 |                                                                                                        |       |                                                                                                         |       |
| 312                                                                                                     | 0.088 |                                                                                                        |       |                                                                                                         |       |
| 307                                                                                                     | 0.027 |                                                                                                        |       |                                                                                                         |       |
| 303                                                                                                     | 0.211 |                                                                                                        |       |                                                                                                         |       |

**Table S3.** Comparative analysis of predicted (PCM/TD-B3LYP/TZVP) UV/vis transitions of  $\text{meG}^{\bullet+}$  and  $[\text{meG:C}^{\text{me}}]^{\bullet+}$

| Transition of $[\text{meG:C}^{\text{me}}]^{\bullet+}$ |                      | assignment                                                                                  | Corresponding transition of $\text{meG}^{\bullet+}$ |                      |
|-------------------------------------------------------|----------------------|---------------------------------------------------------------------------------------------|-----------------------------------------------------|----------------------|
| $\lambda$ / nm                                        | osc. stre.           |                                                                                             | $\lambda$ / nm                                      | osc. stre.           |
| 918                                                   | $6.3 \times 10^{-3}$ | $^a \text{CT}, \pi(\text{C}) \rightarrow \pi^*(\text{G})$                                   | —                                                   | —                    |
| 664                                                   | $2.2 \times 10^{-3}$ | $\text{CT}, \pi(\text{C}) \rightarrow \pi^*(\text{G})$                                      | —                                                   | —                    |
| 529                                                   | $6.7 \times 10^{-3}$ | $\pi(\text{G}) \rightarrow \pi^*(\text{G})$                                                 | 544                                                 | $1.0 \times 10^{-2}$ |
| 499                                                   | $3.2 \times 10^{-2}$ | $\pi(\text{G}) \rightarrow \pi^*(\text{G})$                                                 | 462                                                 | $2.8 \times 10^{-2}$ |
| 374                                                   | 0.112                | $\pi(\text{G}) \rightarrow \pi^*(\text{G})$                                                 | 372                                                 | 0.114                |
| 295                                                   | $1.1 \times 10^{-3}$ | $\text{CT}, \pi(\text{C}) \rightarrow \pi^*(\text{G})$                                      | —                                                   | —                    |
| 293                                                   | 0.127                | $\pi(\text{G}) \rightarrow \pi^*(\text{G})$ and $\pi(\text{C}) \rightarrow \pi^*(\text{C})$ | 290                                                 | 0.104                |
| 266                                                   | 0.134                | $\pi(\text{G}) \rightarrow \pi^*(\text{G})$ and $\pi(\text{C}) \rightarrow \pi^*(\text{C})$ | 271                                                 | 0.189                |
| 263                                                   | 0.174                | $\pi(\text{G}) \rightarrow \pi^*(\text{G})$ and $\pi(\text{C}) \rightarrow \pi^*(\text{C})$ | —                                                   | —                    |

<sup>a</sup>CT is "charge transfer" abbreviated.

**Table S4.** Comparative analysis of predicted (PCM/TD-B3LYP/TZVP) transitions of  $[\text{meG:Cme}]^{*+}$  and  $[\text{meG:Cme/meC:Gme}]^{*+}$

| Transition of $[\text{meG:Cme/meC:Gme}]^{*+}$ |                      |                                                                                                                                                                                                                                                                                               | Corresponding transition of $[\text{meG:Cme}]^{*+}$ |                      |
|-----------------------------------------------|----------------------|-----------------------------------------------------------------------------------------------------------------------------------------------------------------------------------------------------------------------------------------------------------------------------------------------|-----------------------------------------------------|----------------------|
| $\lambda$ / nm                                | osc. stre.           | assignment                                                                                                                                                                                                                                                                                    | $\lambda$ / nm                                      | osc. stre.           |
| 1839                                          | 0.139                | <sup>a,b</sup> $\pi(\text{G}\dots\text{G}) \rightarrow \pi^*(\text{G}\dots\text{G})$                                                                                                                                                                                                          | —                                                   | —                    |
| 1027                                          | $8.0 \times 10^{-3}$ | CT, $\pi(\text{C}\dots\text{C}) \rightarrow \pi^*(\text{G}\dots\text{G})$                                                                                                                                                                                                                     | 918                                                 | $6.3 \times 10^{-3}$ |
| 955                                           | $8.0 \times 10^{-4}$ | CT, $\pi(\text{C}\dots\text{C}) \rightarrow \pi^*(\text{G}\dots\text{G})$                                                                                                                                                                                                                     | 918                                                 | $6.3 \times 10^{-3}$ |
| 739                                           | $4.1 \times 10^{-3}$ | CT, $\pi(\text{C}\dots\text{C}) \rightarrow \pi^*(\text{G}\dots\text{G})$                                                                                                                                                                                                                     | 918                                                 | $6.3 \times 10^{-3}$ |
| 665                                           | $1.6 \times 10^{-3}$ | CT, $\pi(\text{C}\dots\text{C}) \rightarrow \pi^*(\text{G}\dots\text{G})$                                                                                                                                                                                                                     | 664                                                 | $2.2 \times 10^{-3}$ |
| 565                                           | $1.2 \times 10^{-2}$ | $\pi(\text{G}\dots\text{G}) \rightarrow \pi^*(\text{G}\dots\text{G})$                                                                                                                                                                                                                         | 529                                                 | $6.7 \times 10^{-3}$ |
| 539                                           | $1.7 \times 10^{-3}$ | $\pi(\text{G}\dots\text{G}) \rightarrow \pi^*(\text{G}\dots\text{G})$                                                                                                                                                                                                                         | 529                                                 | $3.2 \times 10^{-2}$ |
| 486                                           | $6.5 \times 10^{-3}$ | $\pi(\text{G}\dots\text{G}) \rightarrow \pi^*(\text{G}\dots\text{G})$                                                                                                                                                                                                                         | 499                                                 | $7.7 \times 10^{-3}$ |
| <sup>c</sup> 388                              | $9.0 \times 10^{-4}$ | $\pi(\text{G}\dots\text{G}) \rightarrow \pi^*(\text{G}\dots\text{G})$                                                                                                                                                                                                                         | 374                                                 | 0.112                |
| <sup>c</sup> 381                              | $6.8 \times 10^{-3}$ | $\pi(\text{G}\dots\text{G}) \rightarrow \pi^*(\text{G}\dots\text{G})$                                                                                                                                                                                                                         | 374                                                 | 0.112                |
| 305                                           | $9.0 \times 10^{-4}$ | CT, $\pi(\text{C}\dots\text{C}) \rightarrow \pi^*(\text{G}\dots\text{G})$                                                                                                                                                                                                                     | 295                                                 | $1.1 \times 10^{-3}$ |
| 302                                           | $7.2 \times 10^{-4}$ | CT, $\pi(\text{C}\dots\text{C}) \rightarrow \pi^*(\text{G}\dots\text{G})$                                                                                                                                                                                                                     | 295                                                 | $1.1 \times 10^{-3}$ |
| 270                                           | 0.064                | $\pi(\text{G}\dots\text{G}) \rightarrow \pi^*(\text{G}\dots\text{G})$                                                                                                                                                                                                                         | 293                                                 | 0.127                |
| 268                                           | $9.0 \times 10^{-3}$ | $\pi(\text{G}\dots\text{G}) \rightarrow \pi^*(\text{G}\dots\text{G})$                                                                                                                                                                                                                         | 266                                                 | 0.134                |
| 260                                           | 0.055                | CT, $\pi(\text{C}\dots\text{C}) \rightarrow \pi^*(\text{G}\dots\text{G}) +$<br>$\pi(\text{G}\dots\text{G}) \rightarrow \pi^*(\text{G}) +$<br>$\pi(\text{G}\dots\text{G}) \rightarrow \pi^*(\text{G}\dots\text{G}) +$<br>$\pi(\text{C}\dots\text{C}) \rightarrow \pi^*(\text{C}\dots\text{C})$ | —                                                   | —                    |
| 258                                           | 0.014                | $\pi(\text{C}\dots\text{C}) \rightarrow \pi^*(\text{C}\dots\text{C}) +$<br>CT, $\pi(\text{C}\dots\text{C}) \rightarrow \pi^*(\text{G}\dots\text{G}) +$<br>$\pi(\text{G}\dots\text{G}) \rightarrow \pi^*(\text{G}\dots\text{G}) +$<br>$\pi(\text{G}\dots\text{G}) \rightarrow \pi^*(\text{G})$ | —                                                   | —                    |
| 257                                           | 0.431                | $\pi(\text{C}\dots\text{C}) \rightarrow \pi^*(\text{C}\dots\text{C}) +$<br>$\pi(\text{G}\dots\text{G}) \rightarrow \pi^*(\text{G}) +$<br>CT, $\pi(\text{C}\dots\text{C}) \rightarrow \pi^*(\text{G}\dots\text{G})$                                                                            | —                                                   | —                    |
| <sup>d</sup> 256                              | 0.110                | $\pi(\text{G}\dots\text{G}) \rightarrow \pi^*(\text{G}\dots\text{G}) +$<br>$\pi(\text{G}\dots\text{G}) \rightarrow \pi^*(\text{G})$<br>$\pi(\text{C}\dots\text{C}) \rightarrow \pi^*(\text{C}\dots\text{C}) +$<br>CT, $\pi(\text{C}\dots\text{C}) \rightarrow \pi^*(\text{G}\dots\text{G})$   | —                                                   | —                    |

<sup>a</sup> HOMO-LUMO transition, with both MOs exhibiting electron density equally distributed on both guanines, see Figure S2. <sup>b</sup> G...G and C...C denote the coupled  $\pi$  systems of alternate guanines and cytosines, respectively. <sup>c</sup> Notice the large reduction of intensity with respect to the corresponding transition ( $\lambda = 374$  nm,  $f = 0.112$ ) of  $[\text{meG:Cme}]^{*+}$ . <sup>d</sup> Transitions with oscillator strength less than  $1.0 \times 10^{-4}$  are not reported.

**Table S5.** Predicted (PCM/TD-CAM-B3LYP/TZVP) low energy transitions of  $[\text{meG:Cme/meC:Gme}]^{*+}$

| $\lambda$ / nm | osc. stre.           | assignment                                                                         |
|----------------|----------------------|------------------------------------------------------------------------------------|
| 6263           | 0.17                 | <sup>a</sup> $\pi(\text{G}\dots\text{G}) \rightarrow \pi^*(\text{G}\dots\text{G})$ |
| 612            | $5.8 \times 10^{-3}$ | CT, $\pi(\text{C}\dots\text{C}) \rightarrow \pi^*(\text{G}\dots\text{G})$          |
| 591            | $1.3 \times 10^{-3}$ | CT, $\pi(\text{C}\dots\text{C}) \rightarrow \pi^*(\text{G}\dots\text{G})$          |
| 549            | $1.2 \times 10^{-2}$ | CT, $\pi(\text{C}\dots\text{C}) \rightarrow \pi^*(\text{G}\dots\text{G})$          |
| 522            | $7.8 \times 10^{-3}$ | $\pi(\text{G}\dots\text{G}) \rightarrow \pi^*(\text{G}\dots\text{G})$              |

<sup>a</sup> HOMO-LUMO transition, with both MOs exhibiting electron density equally distributed on both guanines, see Figure S2.

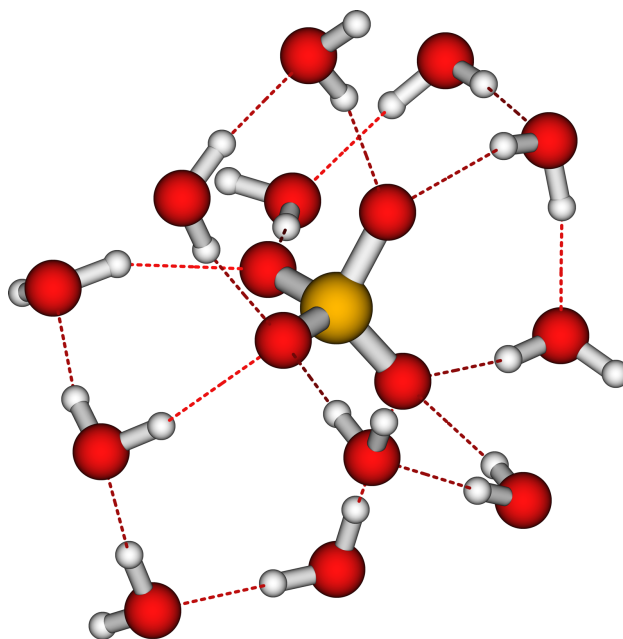

**Figure S3.** Optimized geometry (PCM/B3LYP/6-311++G\*\*) of  $\text{SO}_4^{\bullet-}$  radical anion including its first solvation shell.

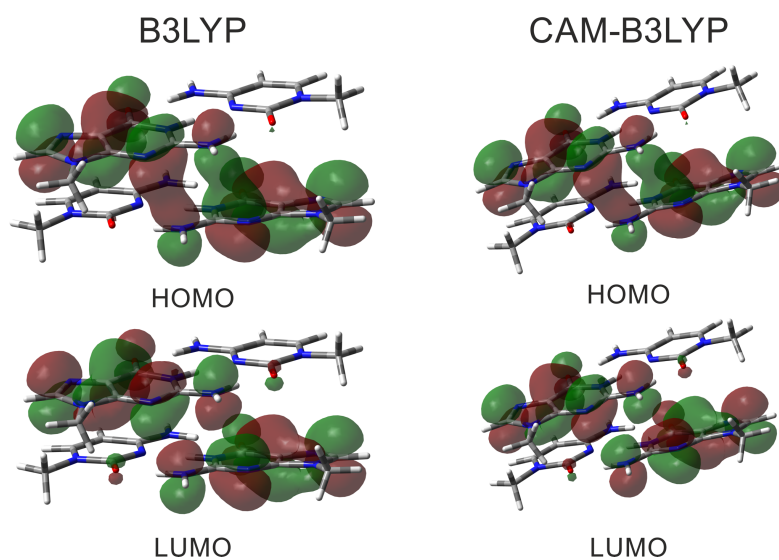

**Figure S4.** Isosurface contour plots of the HOMO and LUMO of  $[\text{meG:C}^{\text{me}}/\text{meC:G}^{\text{me}}]^{\bullet+}$  in both levels of theory (B3LYP and CAM-B3LYP).
